# Supplementary material for: Genome-Wide Assessment for Genetic Variants Associated with Ventricular Dysfunction after Primary Coronary Artery Bypass Graft Surgery
Source: PubMed Central journal article supplement (PMC3184087; doi:10.1371/journal.pone.0024593), 2011-09-30
Supplement: pone.0024593.s005.pdf [file pone.0024593.s005.pdf]

**Supporting Information Table S2. Validation study results: SNP associations with ventricular dysfunction after primary coronary artery bypass graft surgery in 786 European ancestry men from the CABG Genomics Study Cohort. (63 SNPs were selected from 34 genetic loci identified to be associated with ventricular dysfunction in the GWAS)**

| SNP        | Chr #,<br>Location<br>NCBI hg36 | Gene          | GWAS or<br>Additional<br>SNP | Minor<br>Allele/<br>Major<br>Allele | MAF<br>VnD Cases<br>(n=71)*/<br>Controls<br>(n=715) | Genetic<br>Model                             | Unadjusted<br>Odds Ratio     | Univariate<br>Asymptotic<br>P value | Univariate<br>Permuted<br>Point-wise<br>P value | MV<br>Adjusted<br>Odds Ratio | MV<br>Adjusted<br>Asymptotic<br>P value | MV<br>Adjusted<br>Point-wise<br>P value |
|------------|---------------------------------|---------------|------------------------------|-------------------------------------|-----------------------------------------------------|----------------------------------------------|------------------------------|-------------------------------------|-------------------------------------------------|------------------------------|-----------------------------------------|-----------------------------------------|
| rs7549755  | Chr 1,<br>91,930,396            | <i>TGFBR3</i> | GWAS                         | C/T                                 | 0.32/0.21<br><br>GWAS<br>0.33/0.19                  | Allelic<br>Additive<br>Dominant<br>Recessive | 1.78<br>1.81<br>2.23<br>1.67 | 0.002<br>0.002<br>0.002<br>0.30     | 0.003<br>0.003<br>0.002<br>0.31                 | 1.65<br>2.14<br>1.16         | 0.02<br>0.005<br>0.78                   | 0.02<br>0.005<br>0.75                   |
| rs2765888  | Chr 1,<br>91,934,880            |               | Additional                   | T/C                                 | 0.08/0.11                                           | Allelic<br>Additive<br>Dominant<br>Recessive | 0.68<br>0.68<br>0.63<br>1.25 | 0.24<br>0.24<br>0.19<br>0.83        | 0.26<br>0.26<br>0.17<br>0.37                    | 0.84<br>0.77<br>1.96         | 0.61<br>0.48<br>0.54                    | 0.61<br>0.50<br>0.20                    |
| rs6690388  | Chr 1,<br>153,041,071           | <i>KCNN3</i>  | Additional                   | C/T                                 | 0.30/0.20                                           | Allelic<br>Additive<br>Dominant<br>Recessive | 1.78<br>1.75<br>2.16<br>1.62 | 0.003<br>0.004<br>0.002<br>0.33     | 0.002<br>0.003<br>0.001<br>0.31                 | 1.70<br>2.24<br>1.20         | 0.01<br>0.003<br>0.74                   | 0.008<br>0.002<br>0.62                  |
| rs6426944  | Chr 1,<br>153,043,036           | <i>KCNN3</i>  | Additional                   | A/G                                 | 0.37/0.25                                           | Allelic<br>Additive<br>Dominant<br>Recessive | 1.76<br>1.77<br>2.35<br>1.56 | 0.002<br>0.002<br>0.001<br>0.30     | 0.002<br>0.002<br>0.001<br>0.26                 | 1.81<br>2.12<br>2.00         | 0.005<br>0.007<br>0.15                  | 0.006<br>0.007<br>0.12                  |
| rs1702176  | Chr 1,<br>153,043,781           | <i>KCNN3</i>  | Additional                   | T/C                                 | 0.25/0.27                                           | Allelic<br>Additive<br>Dominant<br>Recessive | 0.94<br>0.94<br>1.03<br>0.54 | 0.74<br>0.74<br>0.90<br>0.31        | 0.78<br>0.71<br>0.98<br>0.23                    | 0.83<br>0.87<br>0.53         | 0.41<br>0.61<br>0.32                    | 0.41<br>0.62<br>0.33                    |
| rs2798601  | Chr 1,<br>153,046,309           | <i>KCNN3</i>  | GWAS                         | A/G                                 | 0.30/0.18<br><br>GWAS<br>0.29/0.16                  | Allelic<br>Additive<br>Dominant<br>Recessive | 1.94<br>1.92<br>2.16<br>2.66 | 0.0006<br>0.0009<br>0.002<br>0.04   | 0.001<br>0.001<br>0.002<br>0.04                 | 1.95<br>2.11<br>2.92         | 0.003<br>0.006<br>0.05                  | 0.002<br>0.004<br>0.04                  |
| rs1013219  | Chr 1,<br>175,479,499           | <i>FAM5B</i>  | Additional                   | A/G                                 | 0.36/0.40                                           | Allelic<br>Additive<br>Dominant<br>Recessive | 0.85<br>0.85<br>1.10<br>0.38 | 0.38<br>0.38<br>0.72<br>0.04        | 0.43<br>0.42<br>0.73<br>0.03                    | 0.81<br>1.01<br>0.36         | 0.28<br>0.97<br>0.04                    | 0.27<br>1.00<br>0.04                    |
| rs12744134 | Chr 1,<br>175,490,296           | <i>FAM5B</i>  | GWAS                         | A/G                                 | 0.11/0.23<br><br>GWAS<br>0.11/0.25                  | Allelic<br>Additive<br>Dominant<br>Recessive | 0.42<br>0.42<br>0.43<br>-    | 0.001<br>0.002<br>0.004<br>1.00     | 0.001<br>0.0008<br>0.003<br>0.98                | 0.39<br>0.39<br>-            | 0.002<br>0.003<br>1.00                  | 0.001<br>0.002<br>0.98                  |
| rs10752878 | Chr 1,<br>180,848,998           | <i>RGS16</i>  | GWAS                         | G/T                                 | 0.25/0.14<br><br>GWAS<br>0.27/0.13                  | Allelic<br>Additive<br>Dominant<br>Recessive | 2.09<br>1.98<br>2.16<br>3.38 | 0.0003<br>0.0007<br>0.003<br>0.01   | 0.0006<br>0.0008<br>0.002<br>0.01               | 2.10<br>2.29<br>3.86         | 0.001<br>0.003<br>0.02                  | 0.0008<br>0.004<br>0.01                 |

|                   |                       |  |            |     |                                |                                              |                              |                                                                              |                                     |                      |                                                      |                           |
|-------------------|-----------------------|--|------------|-----|--------------------------------|----------------------------------------------|------------------------------|------------------------------------------------------------------------------|-------------------------------------|----------------------|------------------------------------------------------|---------------------------|
| <b>rs1287820</b>  | Chr 1,<br>180,855,954 |  | GWAS       | G/C | 0.32/0.20<br>GWAS<br>0.34/0.20 | Allelic<br>Additive<br>Dominant<br>Recessive | 1.96<br>2.00<br>2.19<br>3.02 | 0.0004<br>0.0004<br>0.002<br>0.01                                            | 0.001<br>0.0004<br>0.001<br>0.02    | 2.26<br>2.53<br>3.70 | 0.0002<br>0.0008<br>0.008                            | 0.0004<br>0.0002<br>0.008 |
| rs7646796         | Chr 3,<br>6,615,547   |  | Additional | T/C | 0.45/0.43                      | Allelic<br>Additive<br>Dominant<br>Recessive | 1.08<br>1.07<br>0.79<br>1.66 | 0.68<br>0.69<br>0.36<br>0.07                                                 | 0.72<br>0.71<br>0.36<br>0.07        | 1.00<br>0.74<br>1.45 | 0.99<br>0.28<br>0.23                                 | 0.99<br>0.29<br>0.24      |
| rs7430827         | Chr 3,<br>6,617,993   |  | GWAS       | C/A | 0.42/0.36<br>GWAS<br>0.42/0.34 | Allelic<br>Additive<br>Dominant<br>Recessive | 1.29<br>1.28<br>0.86<br>2.76 | 0.16<br>0.17<br>0.53<br>0.0004                                               | 0.17<br>0.16<br>0.62<br>0.001       | 1.45<br>1.08<br>3.03 | 0.05<br>0.77<br>0.0005                               | 0.05<br>0.78<br>0.0002    |
| <b>rs17691914</b> | Chr 3,<br>34,937,807  |  | GWAS       | G/A | 0.19/0.08<br>GWAS<br>0.21/0.07 | Allelic<br>Additive<br>Dominant<br>Recessive | 2.74<br>2.74<br>3.53<br>-    | 9.3X10 <sup>-6</sup><br>2.7X10 <sup>-5</sup><br>2.2X10 <sup>-6</sup><br>1.00 | <0.0001<br>0.0002<br>0.0002<br>0.60 | 2.96<br>3.76<br>-    | 6.0X10 <sup>-5</sup><br>1.1X10 <sup>-5</sup><br>1.00 | 0.0002<br>0.0002<br>0.98  |
| <b>rs9835451</b>  | Chr 3,<br>34,946,568  |  | GWAS       | G/A | 0.22/0.11<br>GWAS<br>0.23/0.11 | Allelic<br>Additive<br>Dominant<br>Recessive | 2.17<br>2.14<br>2.76<br>0.77 | 0.0003<br>0.0005<br>8.1X10 <sup>-5</sup><br>0.80                             | 0.0005<br>0.0006<br>0.0002<br>0.44  | 2.29<br>2.62<br>1.75 | 0.001<br>0.0007<br>0.60                              | 0.0008<br>0.0008<br>0.33  |
| <b>rs17358517</b> | Chr 3,<br>59,660,772  |  | GWAS       | T/C | 0.38/0.23<br>GWAS<br>0.38/0.22 | Allelic<br>Additive<br>Dominant<br>Recessive | 2.07<br>2.07<br>2.57<br>2.52 | 5.8X10 <sup>-5</sup><br>9.6X10 <sup>-5</sup><br>0.0003<br>0.02               | 0.0005<br>0.0002<br>0.0002<br>0.009 | 2.14<br>2.72<br>2.61 | 0.0002<br>0.0004<br>0.02                             | 0.0004<br>0.0004<br>0.01  |
| <b>rs17061085</b> | Chr 3,<br>59,666,765  |  | Additional | A/G | 0.26/0.13                      | Allelic<br>Additive<br>Dominant<br>Recessive | 2.42<br>2.04<br>2.69<br>2.59 | 1.2X10 <sup>-5</sup><br>0.0001<br>0.0001<br>0.03                             | 0.0003<br>0.0004<br>0.0004<br>0.03  | 2.07<br>2.76<br>2.61 | 0.0004<br>0.0003<br>0.05                             | 0.0004<br>0.0002<br>0.04  |
| rs6774674         | Chr 3,<br>67,263,367  |  | Additional | C/T | 0.32/0.39                      | Allelic<br>Additive<br>Dominant<br>Recessive | 0.71<br>0.71<br>0.62<br>0.72 | 0.07<br>0.07<br>0.05<br>0.39                                                 | 0.07<br>0.07<br>0.05<br>0.42        | 0.67<br>0.56<br>0.73 | 0.06<br>0.03<br>0.44                                 | 0.05<br>0.04<br>0.43      |
| rs6766797         | Chr 3,<br>67,266,318  |  | GWAS       | A/T | 0.27/0.36<br>GWAS<br>0.24/0.41 | Allelic<br>Additive<br>Dominant<br>Recessive | 0.64<br>0.63<br>0.51<br>0.75 | 0.02<br>0.02<br>0.007<br>0.49                                                | 0.02<br>0.02<br>0.01<br>0.51        | 0.60<br>0.46<br>0.82 | 0.02<br>0.004<br>0.66                                | 0.02<br>0.005<br>0.70     |
| rs9863767         | Chr 3,<br>75,164,647  |  | GWAS       | A/C | 0.33/0.22<br>GWAS<br>0.34/0.20 | Allelic<br>Additive<br>Dominant<br>Recessive | 1.72<br>1.79<br>1.88<br>2.68 | 0.004<br>0.003<br>0.01<br>0.03                                               | 0.004<br>0.004<br>0.01<br>0.02      | 1.86<br>1.92<br>3.06 | 0.004<br>0.02<br>0.02                                | 0.004<br>0.01<br>0.02     |
| rs9831754         | Chr 3,<br>78,436,281  |  | GWAS       | G/T | 0.29/0.20<br>GWAS<br>0.30/0.18 | Allelic<br>Additive<br>Dominant<br>Recessive | 1.65<br>1.67<br>1.53<br>3.82 | 0.01<br>0.01<br>0.09<br>0.002                                                | 0.01<br>0.01<br>0.06<br>0.003       | 1.53<br>1.48<br>2.81 | 0.05<br>0.15<br>0.03                                 | 0.05<br>0.16<br>0.02      |
| <b>rs9837024</b>  | Chr 3,                |  | GWAS       | G/A | 0.36/0.22                      | Allelic                                      | 1.99                         | 0.0002                                                                       | 0.0003                              |                      |                                                      |                           |

|                  |                       |                |            |     |                                |                                                                              |                                                           |                                  |                                  |                      |                        |                         |
|------------------|-----------------------|----------------|------------|-----|--------------------------------|------------------------------------------------------------------------------|-----------------------------------------------------------|----------------------------------|----------------------------------|----------------------|------------------------|-------------------------|
|                  | 78,534,327            |                |            |     |                                | GWAS<br>0.36/0.21                                                            | Additive<br>2.09<br>Dominant<br>2.01<br>Recessive<br>4.51 | 0.0002<br>0.006<br>0.0001        | 0.0002<br>0.006<br>0.001         | 1.95<br>2.06<br>3.27 | 0.002<br>0.008<br>0.10 | 0.001<br>0.008<br>0.009 |
| rs501833         | Chr 3,<br>184,360,620 | <i>LAMP3</i>   | Additional | C/G | 0.13/0.11                      | Allelic<br>Additive<br>1.22<br>1.23<br>Dominant<br>1.21<br>Recessive<br>2.02 | 1.22<br>1.23<br>1.21<br>2.02                              | 0.46<br>0.45<br>0.51<br>0.52     | 0.46<br>0.44<br>0.52<br>0.35     | 1.10<br>1.11<br>1.20 | 0.74<br>0.75<br>0.88   | 0.76<br>0.75<br>0.44    |
| rs500910         | Chr 3,<br>184,360,726 | <i>LAMP3</i>   | GWAS       | A/T | 0.19/0.32<br>GWAS<br>0.20/0.37 | Allelic<br>Additive<br>0.51<br>Dominant<br>0.41<br>Recessive<br>0.59         | 0.51<br>0.51<br>0.41<br>0.59                              | 0.002<br>0.002<br>0.0007<br>0.32 | 0.002<br>0.002<br>0.0004<br>0.29 | 0.52<br>0.43<br>0.53 | 0.005<br>0.003<br>0.26 | 0.007<br>0.001<br>0.24  |
| rs1965484        | Chr 3,<br>184,361,591 | <i>LAMP3</i>   | GWAS       | A/C | 0.32/0.42<br>GWAS<br>0.32/0.48 | Allelic<br>Additive<br>0.64<br>Dominant<br>0.46<br>Recessive<br>0.87         | 0.64<br>0.64<br>0.46<br>0.87                              | 0.02<br>0.02<br>0.002<br>0.67    | 0.02<br>0.01<br>0.002<br>0.72    | 0.63<br>0.45<br>0.75 | 0.02<br>0.004<br>0.44  | 0.02<br>0.003<br>0.44   |
| rs522838         | Chr 3,<br>184,365,224 | <i>LAMP3</i>   | Additional | G/C | 0.13/0.21                      | Allelic<br>Additive<br>0.57<br>Dominant<br>0.55<br>Recessive<br>0.30         | 0.57<br>0.57<br>0.55<br>0.30                              | 0.02<br>0.03<br>0.03<br>0.23     | 0.03<br>0.02<br>0.04<br>0.15     | 0.58<br>0.56<br>0.28 | 0.04<br>0.06<br>0.22   | 0.04<br>0.05<br>0.15    |
| rs17597256       | Chr 3,<br>198,252,251 | <i>DLG1</i>    | GWAS       | T/C | 0.46/0.40<br>GWAS<br>0.47/0.35 | Allelic<br>Additive<br>1.27<br>1.26<br>Dominant<br>0.90<br>Recessive<br>2.25 | 1.27<br>1.26<br>0.90<br>2.25                              | 0.21<br>0.23<br>0.69<br>0.007    | 0.22<br>0.22<br>0.70<br>0.005    | 1.11<br>0.79<br>1.87 | 0.60<br>0.44<br>0.06   | 0.60<br>0.45<br>0.05    |
| <b>rs4242051</b> | Chr 5,<br>54,234,532  |                | GWAS       | T/C | 0.40/0.28<br>GWAS<br>0.38/0.26 | Allelic<br>Additive<br>1.71<br>1.68<br>Dominant<br>1.47<br>Recessive<br>3.30 | 1.71<br>1.68<br>1.47<br>3.30                              | 0.003<br>0.004<br>0.13<br>0.0002 | 0.005<br>0.003<br>0.11<br>0.0004 | 1.41<br>1.16<br>2.73 | 0.08<br>0.59<br>0.005  | 0.08<br>0.59<br>0.004   |
| rs10223133^      | Chr5,<br>80,469,216   | <i>RASGRF2</i> | Additional | A/G | 0.18/0.20                      | Allelic<br>Additive<br>0.86<br>0.85<br>Dominant<br>0.81<br>Recessive<br>1.12 | 0.86<br>0.85<br>0.81<br>1.12                              | 0.51<br>0.49<br>0.42<br>0.88     | 0.52<br>0.52<br>0.41<br>0.86     | 0.89<br>0.82<br>1.54 | 0.64<br>0.50<br>0.60   | 0.65<br>0.51<br>0.46    |
| rs248989^        | Chr 5,<br>80,472,340  | <i>RASGRF2</i> | Additional | C/T | 0.54/0.44                      | Allelic<br>Additive<br>1.53<br>1.50<br>Dominant<br>1.72<br>Recessive<br>1.75 | 1.53<br>1.50<br>1.72<br>1.75                              | 0.01<br>0.02<br>0.07<br>0.04     | 0.02<br>0.02<br>0.07<br>0.05     | 1.43<br>1.84<br>1.50 | 0.05<br>0.06<br>0.18   | 0.05<br>0.06<br>0.17    |
| rs17213955^      | Chr 5,<br>80,472,997  | <i>RASGRF2</i> | Additional | T/C | 0.18/0.24                      | Allelic<br>Additive<br>0.69<br>0.67<br>Dominant<br>0.64<br>Recessive<br>0.59 | 0.69<br>0.67<br>0.64<br>0.59                              | 0.10<br>0.09<br>0.09<br>0.47     | 0.09<br>0.09<br>0.09<br>0.48     | 0.69<br>0.66<br>0.58 | 0.14<br>0.15<br>0.49   | 0.15<br>0.16<br>0.54    |
| rs369844^        | Chr 5,<br>80,483,382  | <i>RASGRF2</i> | Additional | T/C | 0.25/0.29                      | Allelic<br>Additive<br>0.83<br>0.82<br>Dominant<br>0.83<br>Recessive<br>0.57 | 0.83<br>0.82<br>0.83<br>0.57                              | 0.35<br>0.33<br>0.46<br>0.36     | 0.35<br>0.34<br>0.49<br>0.42     | 0.78<br>0.80<br>0.51 | 0.27<br>0.41<br>0.29   | 0.27<br>0.42<br>0.32    |
| rs4836493        | Chr 5,<br>129,499,621 | <i>CSS3</i>    | GWAS       | A/G | 0.11/0.07                      | Allelic<br>Additive<br>1.69<br>1.68                                          | 1.69<br>1.68                                              | 0.06<br>0.07                     | 0.07<br>0.05                     | 1.87                 | 0.04                   | 0.04                    |

|                         |                       |          |                                                          |     |                                             |                       |              |                              |                  |              |                              |                |
|-------------------------|-----------------------|----------|----------------------------------------------------------|-----|---------------------------------------------|-----------------------|--------------|------------------------------|------------------|--------------|------------------------------|----------------|
|                         |                       |          |                                                          |     | GWAS<br>0.13/0.04                           | Dominant<br>Recessive | 1.73<br>2.54 | 0.08<br>0.41                 | 0.06<br>0.17     | 1.95<br>2.84 | 0.05<br>0.38                 | 0.05<br>0.13   |
| rs1017213               | Chr 5,<br>163,281,156 |          | GWAS                                                     | T/C | 0.44/0.31                                   | Allelic<br>Additive   | 1.77<br>1.70 | 0.001<br>0.002               | 0.002<br>0.0008  | 1.54         | 0.02                         | 0.02           |
|                         |                       |          |                                                          |     | GWAS<br>0.46/0.29                           | Dominant<br>Recessive | 2.00<br>2.14 | 0.009<br>0.02                | 0.009<br>0.009   | 1.83<br>1.70 | 0.03<br>0.14                 | 0.03<br>0.12   |
| rs6459959               | Chr 7,<br>155,390,912 |          | GWAS                                                     | C/G | 0.51/0.36                                   | Allelic<br>Additive   | 1.89<br>1.88 | 0.0003<br>0.0004             | 0.0003<br>0.001  | 1.78         | 0.002                        | 0.003          |
|                         |                       |          |                                                          |     | GWAS<br>0.47/0.33                           | Dominant<br>Recessive | 2.04<br>2.66 | 0.01<br>0.0007               | 0.01<br>0.0008   | 2.08<br>2.30 | 0.02<br>0.008                | 0.02<br>0.005  |
| rs6459961               | Chr 7,<br>155,391,016 |          | GWAS                                                     | C/A | 0.51/0.36                                   | Allelic<br>Additive   | 1.89<br>1.88 | 0.0003<br>0.0004             | 0.0003<br>0.001  | 1.78         | 0.002                        | 0.003          |
|                         |                       |          |                                                          |     | GWAS<br>0.49/0.32                           | Dominant<br>Recessive | 2.04<br>2.66 | 0.01<br>0.0007               | 0.01<br>0.0008   | 2.07<br>2.30 | 0.02<br>0.008                | 0.01<br>0.005  |
| rs10104640              | Chr 8,<br>40,762,563  | ZMAT4    | GWAS                                                     | A/C | 0.38/0.27                                   | Allelic<br>Additive   | 1.66<br>1.58 | 0.006<br>0.009               | 0.007<br>0.007   | 1.63         | 0.01                         | 0.007          |
|                         |                       |          |                                                          |     | GWAS<br>0.37/0.25                           | Dominant<br>Recessive | 1.29<br>3.43 | 0.32<br>6.7X10 <sup>-5</sup> | 0.31<br>0.0002   | 1.39<br>3.51 | 0.23<br>0.0003               | 0.23<br>0.0004 |
| rs4736880               | Chr 8,<br>40,772,063  | ZMAT4    | Additional                                               | T/G | 0.56/0.46                                   | Allelic<br>Additive   | 1.48<br>1.44 | 0.03<br>0.03                 | 0.04<br>0.04     | 1.51         | 0.03                         | 0.03           |
|                         |                       |          |                                                          |     |                                             | Dominant<br>Recessive | 1.19<br>2.16 | 0.54<br>0.003                | 0.49<br>0.003    | 1.22<br>2.38 | 0.51<br>0.003                | 0.51<br>0.002  |
| rs11782961 <sup>@</sup> | Chr 8,<br>124,369,839 |          | r <sup>2</sup> =0.96<br>with<br>GWAS<br>SNP<br>rs1044714 | A/G | 0.37/0.23<br>GWAS<br>rs1044714<br>0.37/0.22 | Allelic<br>Additive   | 1.97<br>1.91 | 0.0002<br>0.0004             | 0.0006<br>0.0008 | 1.87         | 0.001                        | 0.001          |
|                         |                       |          |                                                          |     |                                             | Dominant<br>Recessive | 1.85<br>3.78 | 0.01<br>0.0001               | 0.01<br>0.0006   | 1.98<br>3.26 | 0.01<br>0.003                | 0.01<br>0.003  |
| rs6470145               | Chr 8,<br>124,391,920 |          | Additional                                               | A/G | 0.14/0.07                                   | Allelic<br>Additive   | 2.11<br>2.09 | 0.008<br>0.01                | 0.006<br>0.007   | 1.83         | 0.06                         | 0.06           |
|                         |                       |          |                                                          |     |                                             | Dominant<br>Recessive | 2.23<br>3.07 | 0.01<br>0.32                 | 0.006<br>0.06    | 1.83<br>4.46 | 0.09<br>0.19                 | 0.09<br>0.07   |
| rs6477941               | Chr 9,<br>114,292,170 | KIAA1958 | GWAS                                                     | T/C | 0.12/0.05                                   | Allelic<br>Additive   | 2.46<br>2.40 | 0.001<br>0.002               | 0.003<br>0.0008  | 2.20         | 0.01                         | 0.01           |
|                         |                       |          |                                                          |     | GWAS<br>0.12/0.04                           | Dominant<br>Recessive | 2.60<br>3.39 | 0.002<br>0.29                | 0.0008<br>0.18   | 2.27<br>4.72 | 0.02<br>0.22                 | 0.01<br>0.05   |
| rs10857508              | Chr 10,<br>50,443,270 |          | GWAS                                                     | C/G | 0.14/0.10                                   | Allelic<br>Additive   | 1.54<br>1.49 | 0.10<br>0.11                 | 0.12<br>0.11     | 1.48         | 0.13                         | 0.13           |
|                         |                       |          |                                                          |     | GWAS<br>0.16/0.09                           | Dominant<br>Recessive | 1.21<br>6.70 | 0.54<br>0.001                | 0.60<br>0.005    | 1.30<br>4.73 | 0.43<br>0.02                 | 0.42<br>0.02   |
| rs10832607              | Chr 11,<br>16,419,343 | SOX6     | GWAS                                                     | T/C | 0.28/0.19                                   | Allelic<br>Additive   | 1.69<br>1.68 | 0.007<br>0.009               | 0.01<br>0.007    | 1.81         | 0.006                        | 0.006          |
|                         |                       |          |                                                          |     | GWAS<br>0.29/0.20                           | Dominant<br>Recessive | 1.30<br>6.06 | 0.30<br>5.3X10 <sup>-6</sup> | 0.31<br>0.0002   | 1.40<br>7.66 | 0.22<br>1.2X10 <sup>-5</sup> | 0.24<br>0.0002 |
| rs10500830              | Chr 11,<br>16,441,827 | SOX6     | GWAS                                                     | A/G | 0.28/0.19                                   | Allelic<br>Additive   | 1.71<br>1.71 | 0.006<br>0.007               | 0.008<br>0.007   | 1.83         | 0.005                        | 0.005          |

|                        |                        |                 |                         |     |                                |                       |                           |                                              |                   |              |                                              |                  |
|------------------------|------------------------|-----------------|-------------------------|-----|--------------------------------|-----------------------|---------------------------|----------------------------------------------|-------------------|--------------|----------------------------------------------|------------------|
|                        |                        |                 |                         |     | GWAS<br>0.29/0.20              | Dominant<br>Recessive | 1.40<br>5.37 <sup>^</sup> | 0.18<br>3.6X10 <sup>-5</sup>                 | 0.17<br>0.0002    | 1.54<br>6.18 | 0.12<br>0.0001                               | 0.13<br>0.0002   |
| <b>rs12279572</b>      | Chr 11,<br>117,458,170 | <i>TMPRSS4</i>  | GWAS                    | G/A | 0.36/0.29                      | Allelic<br>Additive   | 1.39<br>1.37              | 0.07<br>0.08                                 | 0.08<br>0.08      | 1.44<br>1.06 | 0.06<br>0.84                                 | 0.05<br>0.85     |
|                        |                        |                 |                         |     | GWAS<br>0.36/0.28              | Dominant<br>Recessive | 0.94<br>3.61              | 0.79<br>3.5X10 <sup>-5</sup>                 | 0.78<br>0.0004    | 3.61         | 0.0002                                       | 0.0006           |
| rs10892210             | Chr 11,<br>117,461,548 | <i>TMPRSS4</i>  | Additional              | T/G | 0.44/0.39                      | Allelic<br>Additive   | 1.24<br>1.23              | 0.22<br>0.23                                 | 0.26<br>0.23      | 1.19<br>1.06 | 0.35<br>0.84                                 | 0.33<br>0.86     |
|                        |                        |                 |                         |     |                                | Dominant<br>Recessive | 1.15<br>1.59              | 0.60<br>0.12                                 | 0.60<br>0.12      | 1.61         | 0.14                                         | 0.12             |
| <b>rs7975290</b>       | Chr 12,<br>26,505,185  | <i>ITPR2</i>    | GWAS                    | G/A | 0.14/0.05                      | Allelic<br>Additive   | 2.96<br>2.91              | 2.5X10 <sup>-5</sup><br>8.4X10 <sup>-5</sup> | 0.0004<br>0.0004  | 3.53<br>4.23 | 4.5X10 <sup>-5</sup><br>1.4X10 <sup>-5</sup> | 0.0006<br>0.0002 |
|                        |                        |                 |                         |     | GWAS<br>0.13/0.05              | Dominant<br>Recessive | 3.56<br>-                 | 1.4X10 <sup>-5</sup><br>1.00                 | 0.0002<br>0.91    | 4.23<br>-    | 1.4X10 <sup>-5</sup><br>1.00                 | 0.0002<br>0.34   |
| <b>rs10773689</b>      | Chr 12,<br>128,686,079 | <i>TMEM132D</i> | GWAS                    | A/C | 0.24/0.39                      | Allelic<br>Additive   | 0.50<br>0.50              | 0.0005<br>0.0007                             | 0.001<br>0.0004   | 0.47<br>0.45 | 0.0005<br>0.004                              | 0.0008<br>0.004  |
|                        |                        |                 |                         |     | GWAS<br>0.23/0.41              | Dominant<br>Recessive | 0.48<br>0.24              | 0.003<br>0.02                                | 0.002<br>0.01     | 0.19         | 0.008                                        | 0.003            |
| rs11060480             | Chr 12,<br>128,692,468 | <i>TMEM132D</i> | GWAS                    | G/A | 0.65/0.48                      | Allelic<br>Additive   | 1.96<br>1.99              | 0.0002<br>0.0002                             | 0.0003<br>0.0004  | 2.23<br>3.59 | 0.0001<br>0.003                              | 0.0004<br>0.003  |
|                        |                        |                 |                         |     | GWAS<br>0.34/0.48              | Dominant<br>Recessive | 3.26<br>2.17              | 0.004<br>0.003                               | 0.004<br>0.003    | 2.51         | 0.002                                        | 0.001            |
| <b>rs10519861</b>      | Chr 15,<br>31,773,350  | <i>RYR3</i>     | GWAS                    | T/G | 0.56/0.40                      | Allelic<br>Additive   | 1.96<br>2.00              | 0.0001<br>0.0001                             | <0.0001<br>0.0002 | 2.18<br>2.90 | 0.0001<br>0.002                              | 0.0002<br>0.002  |
|                        |                        |                 |                         |     | GWAS<br>0.44/0.39              | Dominant<br>Recessive | 2.74<br>2.34              | 0.002<br>0.002                               | 0.0006<br>0.003   | 2.67         | 0.002                                        | 0.002            |
| <b>rs8027394</b>       | Chr 15,<br>76,404,968  |                 | GWAS                    | T/C | 0.48/0.30                      | Allelic<br>Additive   | 2.12<br>2.06              | 1.8X10 <sup>-5</sup><br>4.2X10 <sup>-5</sup> | <0.0001<br>0.0002 | 2.12<br>2.24 | 0.0002<br>0.006                              | 0.0004<br>0.006  |
|                        |                        |                 |                         |     | GWAS<br>0.47/0.31              | Dominant<br>Recessive | 2.49<br>2.86              | 0.0009<br>0.0006                             | 0.001<br>0.001    | 3.44         | 0.0004                                       | 0.0008           |
| rs925987               | Chr 15,<br>76,406,948  |                 | Additional              | C/T | 0.49/0.33                      | Allelic<br>Additive   | 1.96<br>1.93              | 0.0001<br>0.0002                             | 0.0002<br>0.001   | 1.91<br>1.98 | 0.001<br>0.02                                | 0.001<br>0.02    |
|                        |                        |                 |                         |     |                                | Dominant<br>Recessive | 2.26<br>2.62              | 0.003<br>0.001                               | 0.003<br>0.001    | 2.88         | 0.002                                        | 0.003            |
| <b>rs12593362</b>      | Chr 15,<br>76,421,786  | <i>CRABP1</i>   | Additional              | T/G | 0.47/0.31                      | Allelic<br>Additive   | 1.99<br>1.99              | 8.4X10 <sup>-5</sup><br>0.0001               | <0.0001<br>0.0002 | 2.10<br>2.82 | 0.0002<br>0.0007                             | 0.0004<br>0.0006 |
|                        |                        |                 |                         |     |                                | Dominant<br>Recessive | 2.70<br>2.26              | 0.0004<br>0.01                               | 0.0004<br>0.005   | 2.40         | 0.02                                         | 0.01             |
| rs2437788              | Chr 15,<br>84,987,337  |                 | Additional              | T/C | 0.44/0.38                      | Allelic<br>Additive   | 1.26<br>1.25              | 0.19<br>0.20                                 | 0.20<br>0.19      | 1.23<br>1.48 | 0.28<br>0.17                                 | 0.27<br>0.17     |
|                        |                        |                 |                         |     |                                | Dominant<br>Recessive | 1.42<br>1.26              | 0.19<br>0.48                                 | 0.19<br>0.42      | 1.10         | 0.79                                         | 0.82             |
| rs2469182 <sup>±</sup> | Chr 15,<br>84,990,324  |                 | r2=0.86<br>with<br>GWAS | A/T | 0.18/0.10<br>GWAS<br>rs7183919 | Allelic<br>Additive   | 1.93<br>1.88              | 0.004<br>0.006                               | 0.006<br>0.004    | 1.81<br>2.06 | 0.02<br>0.01                                 | 0.02<br>0.01     |
|                        |                        |                 |                         |     |                                | Dominant              | 2.14                      | 0.005                                        | 0.002             |              |                                              |                  |

|                        |                       |              |                                             |     |           |           |      |                      |        |      |                      |        |
|------------------------|-----------------------|--------------|---------------------------------------------|-----|-----------|-----------|------|----------------------|--------|------|----------------------|--------|
|                        |                       |              | SNP<br>rs7183919                            |     | 0.22/0.11 | Recessive | 1.86 | 0.43                 | 0.17   | 1.66 | 0.56                 | 0.35   |
| <b>rs8058644</b>       | Chr 16,<br>48,454,181 |              | GWAS                                        | T/C | 0.18/0.07 | Allelic   | 2.72 | $1.9 \times 10^{-5}$ | 0.0002 |      |                      |        |
|                        |                       |              |                                             |     | GWAS      | Additive  | 2.61 | $6.8 \times 10^{-5}$ | 0.0004 | 2.86 | $8.7 \times 10^{-5}$ | 0.0004 |
|                        |                       |              |                                             |     | 0.16/0.06 | Dominant  | 3.02 | $6.3 \times 10^{-5}$ | 0.0004 | 3.50 | $5.8 \times 10^{-5}$ | 0.0006 |
|                        |                       |              |                                             |     |           | Recessive | 3.42 | 0.14                 | 0.03   | 3.33 | 0.17                 | 0.13   |
| rs17212151             | Chr 16,<br>48,472,935 |              | Additional                                  | T/C | 0.18/0.10 | Allelic   | 2.03 | 0.002                | 0.005  |      |                      |        |
|                        |                       |              |                                             |     |           | Additive  | 1.96 | 0.004                | 0.003  | 2.23 | 0.001                | 0.0008 |
|                        |                       |              |                                             |     |           | Dominant  | 2.24 | 0.003                | 0.003  | 2.85 | 0.0006               | 0.0004 |
|                        |                       |              |                                             |     |           | Recessive | 2.04 | 0.36                 | 0.20   | 1.93 | 0.42                 | 0.24   |
| rs12968495             | Chr 18,<br>10,267,737 |              | Additional                                  | C/T | 0.31/0.36 | Allelic   | 0.81 | 0.27                 | 0.29   |      |                      |        |
|                        |                       |              |                                             |     |           | Additive  | 0.82 | 0.28                 | 0.29   | 0.90 | 0.60                 | 0.60   |
|                        |                       |              |                                             |     |           | Dominant  | 0.84 | 0.48                 | 0.49   | 0.87 | 0.62                 | 0.61   |
|                        |                       |              |                                             |     |           | Recessive | 0.60 | 0.25                 | 0.22   | 0.86 | 0.76                 | 0.77   |
| <b>rs16974035</b>      | Chr 18,<br>10,269,356 |              | GWAS                                        | G/A | 0.49/0.34 | Allelic   | 1.86 | 0.0004               | 0.0005 |      |                      |        |
|                        |                       |              |                                             |     |           | Additive  | 1.86 | 0.0005               | 0.0004 | 1.96 | 0.0005               | 0.001  |
|                        |                       |              |                                             |     |           | Dominant  | 2.00 | 0.01                 | 0.008  | 2.08 | 0.01                 | 0.009  |
|                        |                       |              |                                             |     |           | Recessive | 2.68 | 0.001                | 0.001  | 3.07 | 0.0008               | 0.0006 |
| rs9959544              | Chr 18,<br>55,478,330 | <i>CCBE1</i> | Additional                                  | G/A | 0.25/0.36 | Allelic   | 0.58 | 0.006                | 0.008  |      |                      |        |
|                        |                       |              |                                             |     |           | Additive  | 0.58 | 0.007                | 0.006  | 0.66 | 0.06                 | 0.06   |
|                        |                       |              |                                             |     |           | Dominant  | 0.47 | 0.003                | 0.002  | 0.54 | 0.02                 | 0.02   |
|                        |                       |              |                                             |     |           | Recessive | 0.63 | 0.29                 | 0.28   | 0.84 | 0.71                 | 0.70   |
| rs8093323 <sup>Ⓢ</sup> | Chr 18,<br>55,479,651 | <i>CCBE1</i> | r2=0.84<br>with<br>GWAS<br>SNP<br>rs6567111 | G/A | 0.25/0.36 | Allelic   | 0.59 | 0.008                | 0.01   |      |                      |        |
|                        |                       |              |                                             |     |           | Additive  | 0.59 | 0.009                | 0.007  | 0.68 | 0.08                 | 0.08   |
|                        |                       |              |                                             |     |           | Dominant  | 0.48 | 0.004                | 0.003  | 0.55 | 0.03                 | 0.03   |
|                        |                       |              |                                             |     |           | Recessive | 0.65 | 0.34                 | 0.29   | 0.91 | 0.84                 | 0.84   |
| rs2062980              | Chr 18,<br>60,573,886 |              | GWAS                                        | T/G | 0.52/0.41 | Allelic   | 1.58 | 0.009                | 0.01   |      |                      |        |
|                        |                       |              |                                             |     |           | Additive  | 1.57 | 0.01                 | 0.009  | 1.43 | 0.07                 | 0.07   |
|                        |                       |              |                                             |     |           | Dominant  | 1.72 | 0.06                 | 0.06   | 1.46 | 0.22                 | 0.22   |
|                        |                       |              |                                             |     |           | Recessive | 1.94 | 0.02                 | 0.02   | 1.77 | 0.07                 | 0.07   |
| rs1011636              | Chr 20,<br>50,264,021 |              | Additional                                  | G/C | 0.46/0.41 | Allelic   | 1.25 | 0.20                 | 0.22   |      |                      |        |
|                        |                       |              |                                             |     |           | Additive  | 1.24 | 0.21                 | 0.20   | 1.27 | 0.21                 | 0.21   |
|                        |                       |              |                                             |     |           | Dominant  | 1.33 | 0.29                 | 0.31   | 1.31 | 0.36                 | 0.36   |
|                        |                       |              |                                             |     |           | Recessive | 1.35 | 0.32                 | 0.28   | 1.46 | 0.25                 | 0.25   |
| rs2016367              | Chr 20,<br>50,276,712 |              | GWAS                                        | C/G | 0.30/0.22 | Allelic   | 1.48 | 0.04                 | 0.05   |      |                      |        |
|                        |                       |              |                                             |     |           | Additive  | 1.46 | 0.05                 | 0.04   | 1.40 | 0.11                 | 0.10   |
|                        |                       |              |                                             |     |           | Dominant  | 1.25 | 0.37                 | 0.35   | 1.13 | 0.66                 | 0.65   |
|                        |                       |              |                                             |     |           | Recessive | 3.28 | 0.002                | 0.004  | 3.64 | 0.002                | 0.003  |

Chr = chromosome; GWAS = genome wide association study; MAF = minor allele frequency; MV = multivariable; SNP = single nucleotide polymorphism; VnD = ventricular dysfunction;

\* 71 VnD cases are a successfully genotyped subset of the 76 VnD cases in the initial GWAS.

# SNPs in bold font are 19 SNPs (from 15 genetic loci) that were selected for replication study efforts in both the Vanderbilt cohort (Supporting Information Table S3) and in new VnD cases from the CABG Genomics cohort (Supporting Information Table S4).

^ rs42430 GWAS lead SNP failed Sequenom genotyping but 4 alternate additional SNPs were genotyped to represent the linkage disequilibrium blocks in the region.

@ rs1044714 GWAS lead SNP failed Sequenom genotyping but rs11782961 which is in strong linkage disequilibrium with rs1044714 and was genotyped successfully.

± rs7183919 GWAS lead SNP failed primer formation for Sequenom genotyping but rs2469182 which is in linkage disequilibrium with rs7183919 was genotyped successfully.

© rs6567111 GWAS lead SNP failed primer formation for Sequenom genotyping but rs8093323 which is in linkage disequilibrium with rs6567111 was genotyped successfully.
